# Supplementary material for: Unveiling ultrafast carrier dynamics in photocatalytic 2-D heterostructures: insights from first-principles and nonadiabatic molecular dynamics
Source: Royal Society of Chemistry journal article supplement (doi:10.1039/d4ta04427d), 2024-01-01
Supplement: d4ta04427d1.pdf [file d4ta04427d1.pdf]

## Supplementary Materials

### **Unveiling ultrafast carrier dynamics in photocatalytic 2-D heterostructures: Insights from first-principles and nonadiabatic molecular dynamics†**

Zelong Gong,<sup>a</sup> Zhao Qian,<sup>a,\*</sup> Jian Gao,<sup>a</sup> Kaixin Yang,<sup>a</sup> Shiyu Cao,<sup>a</sup> Muhammad  
Sajjad,<sup>a</sup> Yuanning Jiang,<sup>a</sup> Jianqiang Bi,<sup>a</sup> Rajeev Ahuja<sup>b</sup>

<sup>a</sup> *Key Laboratory for Liquid-Solid Structural Evolution and Processing of Materials  
(Ministry of Education), School of Materials Science and Engineering, Shandong  
University, Jinan, China*

<sup>b</sup> *Condensed Matter Theory, Materials Theory Division, Department of Physics and  
Astronomy, Uppsala University, Uppsala, Sweden*

\*Correspondence to: [qianzhao@sdu.edu.cn](mailto:qianzhao@sdu.edu.cn) (prof. Zhao Qian)

Text S1 The calculations details of NAMD.

For the calculation of excited state dynamics of photogenerated carriers, the quantum decoherence-induced surface hopping (DISH) method under the classical path approximation was used for NAMD calculations. Based on the optimized geometric structure at 0 K, the velocity rescaling method was used to increase the system temperature to 300 K, then 5 ps trajectories are sampled under the NVE ensemble, the last 2000 trajectories are selected, and the corresponding wave functions are generated. NAMD results are averaged over 100 different initial structures in the trajectory.

Text S2 Calculation of Gibbs free energy.

The HER proceeds via a two-electronic reaction step, represented by Eqs. 1-2, where \* denotes the reactive site on the GaN/SnS<sub>2</sub> heterostructure.

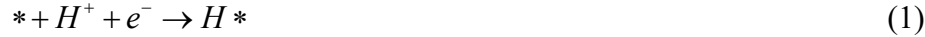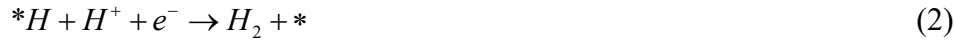

The OER proceeds via a four-electronic reaction step, represented by Eqs. 3-6, where *OH\**, *O\**, and *OOH\** denote the intermediates in the process of reaction, respectively.

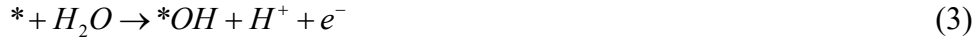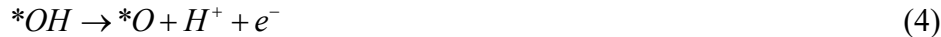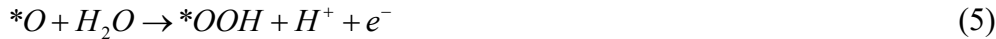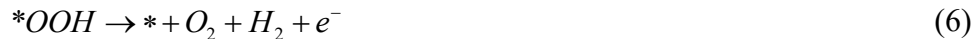

The activity of the reaction is determined by the changes of Gibbs free energy ( $\Delta G$ ) of the intermediates in the HER and OER, as defined by Nørskov:<sup>39</sup>

$$\Delta G = \Delta E + \Delta E_{ZPE} - T\Delta S + \Delta G_{pH} + \Delta G_U \quad (7)$$

here,  $\Delta E$  represents the adsorption energy of the reaction intermediates calculated by DFT,  $\Delta E_{ZPE}$  and  $T\Delta S$  are the zero-point energy and entropy of the intermediates, respectively. The influence of pH and external potential on  $\Delta G$  is reflected by  $\Delta G_{pH}$  and  $\Delta G_U$ , with  $\Delta G_{pH} = -kT \ln(10) \times pH$  and  $\Delta G_U = -eU$ , where  $U$  is the electrode potential relative to the standard hydrogen electrode (SHE) potential.

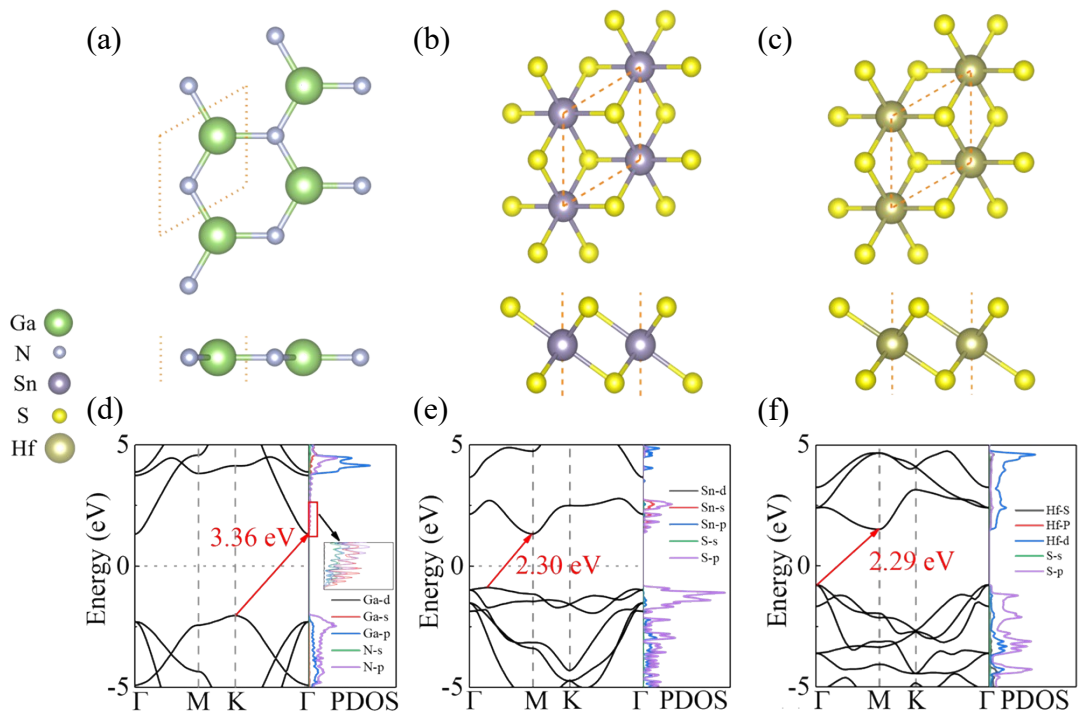

Fig. S1. The optimized geometrical structures of (a) GaN, (b) SnS<sub>2</sub>, and (c) HfS<sub>2</sub> monolayers. (d-f) The band structures and PDOS of monolayers.

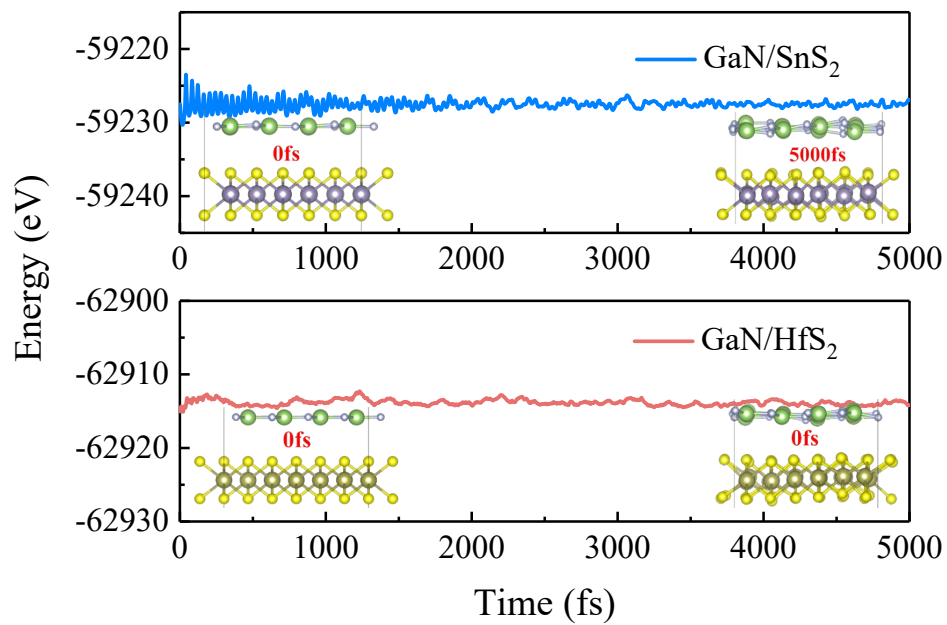

Fig. S2. Changes in energy of GaN/SnS<sub>2</sub> and GaN/HfS<sub>2</sub> heterostructures during a 5 ps AIMD simulation at 300K. Insets display the initial and final structures of heterostructures during simulation.

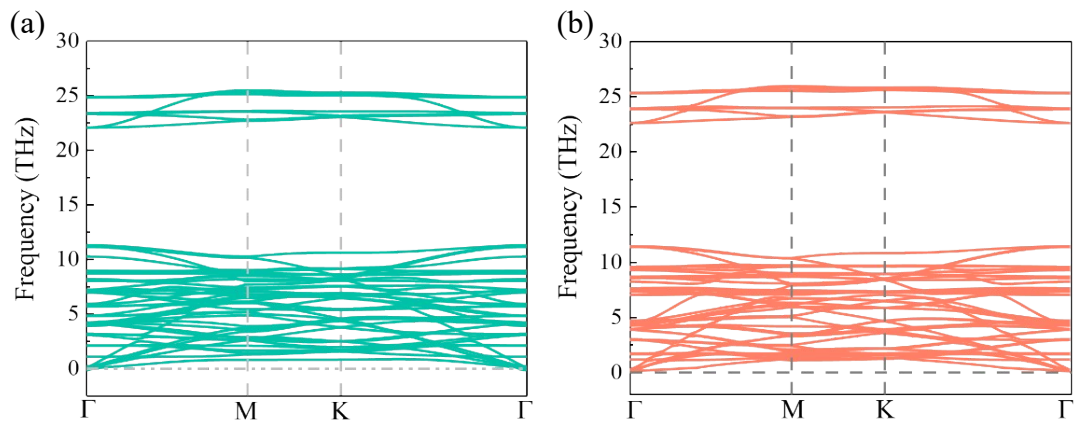

Fig. S3. Phonon dispersion spectra of (a) GaN/SnS<sub>2</sub> and (b) GaN/HfS<sub>2</sub> heterostructures.

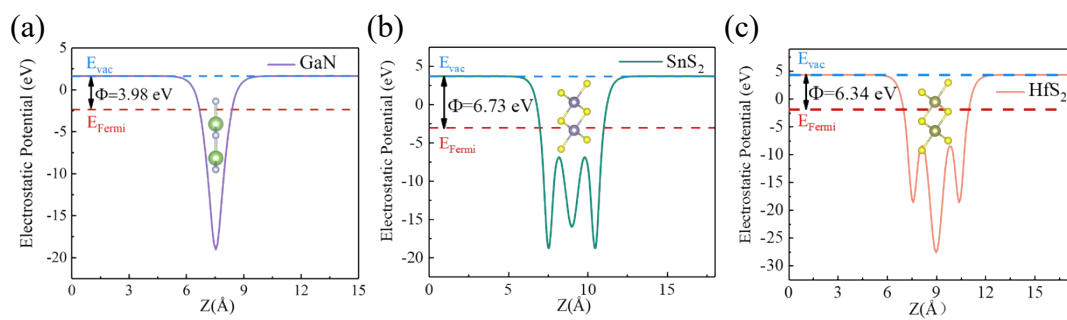

Fig. S4. Electrostatic potential of monolayers: (a) GaN, (b) SnS<sub>2</sub>, and (c) HfS<sub>2</sub>.

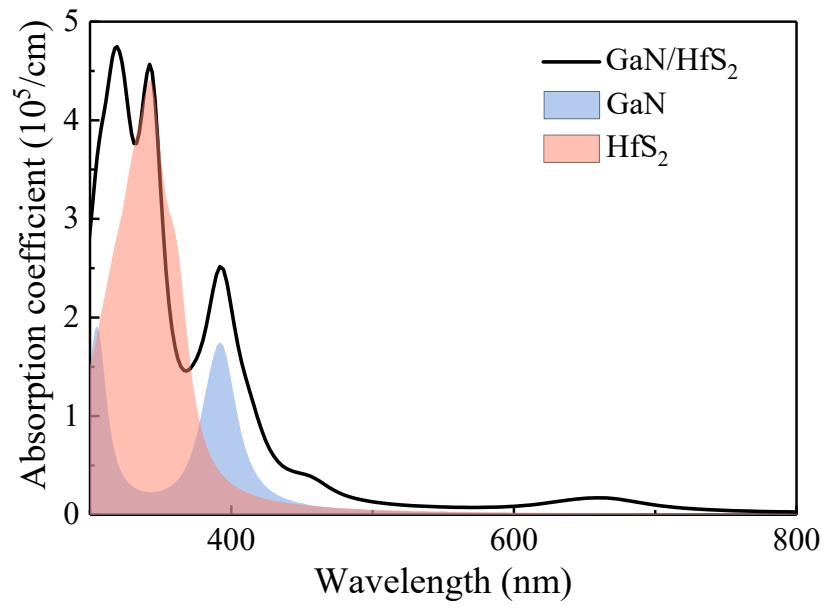

Fig. S5. Optical absorption spectra of GaN, HfS<sub>2</sub>, and GaN/HfS<sub>2</sub> heterostructure.

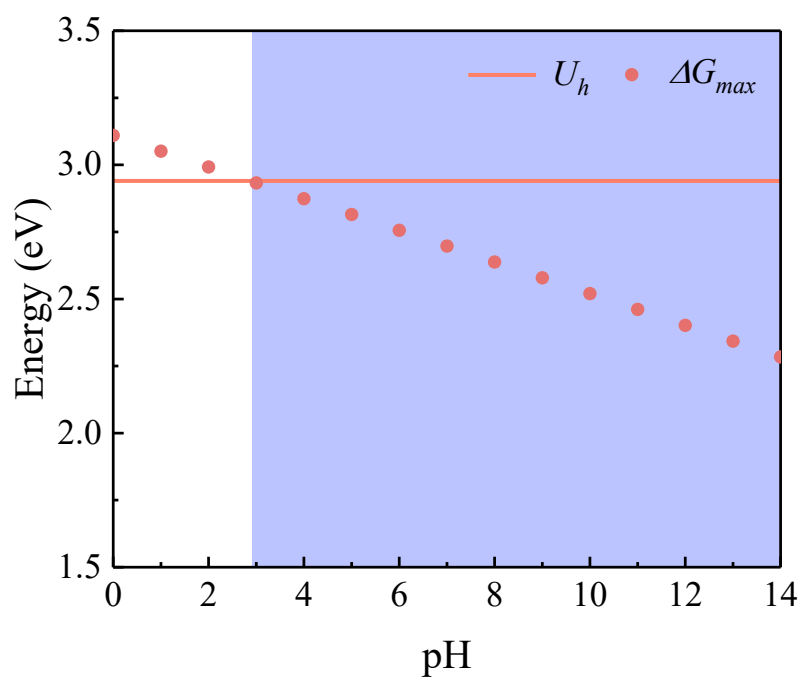

Fig. S6 The value of  $\Delta G_{max}$  changed with pH. The purple area represents the pH range in which OER can proceed spontaneously.



Table. S1. The optimized lattice constant(a,b), interlayer distance between

| Systems              | a=b(Å) | d(Å) | $E_b(\text{meV}/\text{Å}^2)$ | $E_g(\text{eV})$ |
|----------------------|--------|------|------------------------------|------------------|
| GaN                  | 3.20   | -    | -                            | 3.36             |
| SnS <sub>2</sub>     | 3.70   | -    | -                            | 2.30             |
| HfS <sub>2</sub>     | 3.64   | -    | -                            | 2.29             |
| GaN/SnS <sub>2</sub> | 6.39   | 3.25 | -16.21                       | 1.04             |
| GaN/HfS <sub>2</sub> | 6.36   | 3.35 | -17.73                       | 1.28             |

monolayers(d), binding energy( $E_b$ ) and bandgap( $E_g$ ) of all systems.

Structure file

1.GaN.cif

```
#=====
=====
```

# CRYSTAL DATA

```
#-----
```

data\_VESTA\_phase\_1

|                           |                        |
|---------------------------|------------------------|
| _chemical_name_common     | 'Converted from PWmat' |
| _cell_length_a            | 3.202300               |
| _cell_length_b            | 3.202300               |
| _cell_length_c            | 15.000000              |
| _cell_angle_alpha         | 90.000000              |
| _cell_angle_beta          | 90.000000              |
| _cell_angle_gamma         | 120.000000             |
| _cell_volume              | 133.212795             |
| _space_group_name_H-M_alt | 'P 1'                  |
| _space_group_IT_number    | 1                      |

loop\_

|                                  |           |
|----------------------------------|-----------|
| _space_group_symop_operation_xyz | 'x, y, z' |
|----------------------------------|-----------|

loop\_

|                           |     |          |          |          |      |      |
|---------------------------|-----|----------|----------|----------|------|------|
| _atom_site_label          |     |          |          |          |      |      |
| _atom_site_occupancy      |     |          |          |          |      |      |
| _atom_site_fract_x        |     |          |          |          |      |      |
| _atom_site_fract_y        |     |          |          |          |      |      |
| _atom_site_fract_z        |     |          |          |          |      |      |
| _atom_site_adp_type       |     |          |          |          |      |      |
| _atom_site_U_iso_or_equiv |     |          |          |          |      |      |
| _atom_site_type_symbol    |     |          |          |          |      |      |
| Ga1                       | 1.0 | 0.333333 | 0.666666 | 0.500000 | Uiso | ? Ga |
| N1                        | 1.0 | 0.666667 | 0.333333 | 0.500000 | Uiso | ? N  |

2.SnS<sub>2</sub>.cif

```
#=====
=====
```

# CRYSTAL DATA

```
#-----
```

data\_VESTA\_phase\_1

```

_chemical_name_common          'Converted from PWmat'
_cell_length_a                 3.763300
_cell_length_b                 3.763300
_cell_length_c                 17.955143
_cell_angle_alpha              90.000000
_cell_angle_beta               90.000000
_cell_angle_gamma              120.000000
_cell_volume                   220.220207
_space_group_name_H-M_alt      'P 1'
_space_group_IT_number         1

```

```

loop_
_space_group_symop_operation_xyz
  'x, y, z'

```

```

loop_
  _atom_site_label
  _atom_site_occupancy
  _atom_site_fract_x
  _atom_site_fract_y
  _atom_site_fract_z
  _atom_site_adp_type
  _atom_site_U_iso_or_equiv
  _atom_site_type_symbol
  Sn1          1.0      0.999901    0.000027    0.499993    Uiso  ? Sn
  S1           1.0      0.666649    0.333339    0.580274    Uiso  ? S
  S2           1.0      0.333312    0.666671    0.419660    Uiso  ? S

```

### 3.HfS<sub>2</sub>.cif

```

#=====
=====
# CRYSTAL DATA
#-----
data_VESTA_phase_1

```

```

_chemical_name_common          'Converted from PWmat'
_cell_length_a                 3.640009
_cell_length_b                 3.640009
_cell_length_c                 17.891550
_cell_angle_alpha              90.000000
_cell_angle_beta               90.000000
_cell_angle_gamma              120.000000
_cell_volume                   205.297476

```

\_space\_group\_name\_H-M\_alt 'P 1'  
\_space\_group\_IT\_number 1

loop\_  
\_space\_group\_symop\_operation\_xyz  
'x, y, z'

loop\_  
\_atom\_site\_label  
\_atom\_site\_occupancy  
\_atom\_site\_fract\_x  
\_atom\_site\_fract\_y  
\_atom\_site\_fract\_z  
\_atom\_site\_adp\_type  
\_atom\_site\_U\_iso\_or\_equiv  
\_atom\_site\_type\_symbol  
Hf1 1.0 0.000000 0.000000 0.500000 Uiso ? Hf  
S1 1.0 0.666667 0.333333 0.580208 Uiso ? S  
S2 1.0 0.333333 0.666667 0.419792 Uiso ? S

#### 4.GaN/SnS<sub>2</sub>.cif

#=====  
=====

#### # CRYSTAL DATA

#-----  
data\_VESTA\_phase\_1

\_chemical\_name\_common 'Converted from PWmat'  
\_cell\_length\_a 6.394580  
\_cell\_length\_b 6.394580  
\_cell\_length\_c 25.296225  
\_cell\_angle\_alpha 90.000000  
\_cell\_angle\_beta 90.000000  
\_cell\_angle\_gamma 120.000000  
\_cell\_volume 895.798658  
\_space\_group\_name\_H-M\_alt 'P 1'  
\_space\_group\_IT\_number 1

loop\_  
\_space\_group\_symop\_operation\_xyz  
'x, y, z'

loop\_

| _atom_site_label          |     |          |          |          |      |      |
|---------------------------|-----|----------|----------|----------|------|------|
| _atom_site_occupancy      |     |          |          |          |      |      |
| _atom_site_fract_x        |     |          |          |          |      |      |
| _atom_site_fract_y        |     |          |          |          |      |      |
| _atom_site_fract_z        |     |          |          |          |      |      |
| _atom_site_adp_type       |     |          |          |          |      |      |
| _atom_site_U_iso_or_equiv |     |          |          |          |      |      |
| _atom_site_type_symbol    |     |          |          |          |      |      |
| Ga1                       | 1.0 | 0.325921 | 0.324658 | 0.378280 | Uiso | ? Ga |
| Ga2                       | 1.0 | 0.826101 | 0.324888 | 0.376456 | Uiso | ? Ga |
| Ga3                       | 1.0 | 0.325355 | 0.824374 | 0.376461 | Uiso | ? Ga |
| Ga4                       | 1.0 | 0.826034 | 0.824298 | 0.376453 | Uiso | ? Ga |
| Sn1                       | 1.0 | 0.999154 | 0.999611 | 0.565416 | Uiso | ? Sn |
| Sn2                       | 1.0 | 0.333515 | 0.666890 | 0.565429 | Uiso | ? Sn |
| Sn3                       | 1.0 | 0.666320 | 0.332375 | 0.565395 | Uiso | ? Sn |
| S1                        | 1.0 | 0.999963 | 0.333201 | 0.623853 | Uiso | ? S  |
| S2                        | 1.0 | 0.332885 | 0.999898 | 0.623886 | Uiso | ? S  |
| S3                        | 1.0 | 0.666166 | 0.665812 | 0.623851 | Uiso | ? S  |
| S4                        | 1.0 | 0.999785 | 0.666437 | 0.507056 | Uiso | ? S  |
| S5                        | 1.0 | 0.332887 | 0.332860 | 0.506749 | Uiso | ? S  |
| S6                        | 1.0 | 0.666255 | 0.999496 | 0.506626 | Uiso | ? S  |
| N1                        | 1.0 | 0.492707 | 0.157871 | 0.377397 | Uiso | ? N  |
| N2                        | 1.0 | 0.992450 | 0.157739 | 0.377362 | Uiso | ? N  |
| N3                        | 1.0 | 0.492603 | 0.658189 | 0.377354 | Uiso | ? N  |
| N4                        | 1.0 | 0.992508 | 0.657821 | 0.371684 | Uiso | ? N  |

## 5.GaN/HfS<sub>2</sub>.cif

```
#=====
=====
```

```
# CRYSTAL DATA
```

```
#-----
```

```
data_VESTA_phase_1
```

|                           |                        |
|---------------------------|------------------------|
| _chemical_name_common     | 'Converted from PWmat' |
| _cell_length_a            | 6.358512               |
| _cell_length_b            | 6.358990               |
| _cell_length_c            | 25.000000              |
| _cell_angle_alpha         | 90.000000              |
| _cell_angle_beta          | 90.000000              |
| _cell_angle_gamma         | 119.993591             |
| _cell_volume              | 875.472136             |
| _space_group_name_H-M_alt | 'P 1'                  |
| _space_group_IT_number    | 1                      |

loop\_  
\_space\_group\_symop\_operation\_xyz  
'x, y, z'

loop\_  
\_atom\_site\_label  
\_atom\_site\_occupancy  
\_atom\_site\_fract\_x  
\_atom\_site\_fract\_y  
\_atom\_site\_fract\_z  
\_atom\_site\_adp\_type  
\_atom\_site\_U\_iso\_or\_equiv  
\_atom\_site\_type\_symbol

|     |     |           |           |          |      |      |
|-----|-----|-----------|-----------|----------|------|------|
| N1  | 1.0 | 0.333269  | 0.165950  | 0.597956 | Uiso | ? N  |
| N2  | 1.0 | 0.834463  | 0.168247  | 0.597951 | Uiso | ? N  |
| N3  | 1.0 | 0.333350  | 0.667125  | 0.597192 | Uiso | ? N  |
| N4  | 1.0 | 0.832200  | 0.667118  | 0.597950 | Uiso | ? N  |
| S1  | 1.0 | 0.667000  | 0.000419  | 0.463148 | Uiso | ? S  |
| S2  | 1.0 | 0.333407  | 0.332993  | 0.463149 | Uiso | ? S  |
| S3  | 1.0 | -0.000429 | 0.666576  | 0.463148 | Uiso | ? S  |
| S4  | 1.0 | 0.333325  | -0.000287 | 0.349585 | Uiso | ? S  |
| S5  | 1.0 | 0.000309  | 0.333613  | 0.349587 | Uiso | ? S  |
| S6  | 1.0 | 0.666417  | 0.666707  | 0.349584 | Uiso | ? S  |
| Ga1 | 1.0 | 0.167820  | 0.334105  | 0.596988 | Uiso | ? Ga |
| Ga2 | 1.0 | 0.666620  | 0.333795  | 0.597339 | Uiso | ? Ga |
| Ga3 | 1.0 | 0.165736  | 0.832628  | 0.596988 | Uiso | ? Ga |
| Ga4 | 1.0 | 0.666440  | 0.834740  | 0.596984 | Uiso | ? Ga |
| Hf1 | 1.0 | -0.000001 | 0.000008  | 0.406311 | Uiso | ? Hf |
| Hf2 | 1.0 | 0.666684  | 0.333340  | 0.406098 | Uiso | ? Hf |
| Hf3 | 1.0 | 0.333322  | 0.666659  | 0.406679 | Uiso | ? Hf |
